# Supplementary material for: AG-348 (mitapivat), an allosteric activator of red blood cell pyruvate kinase, increases enzymatic activity, protein stability, and adenosine triphosphate levels over a broad range of PKLR genotypes
Source: PubMed Central journal article supplement — Haematologica. 2020 Jan 23;106(1):238–49. doi: 10.3324/haematol.2019.238865 (PMC7776327; doi:10.3324/haematol.2019.238865), 2020-01-23
Supplement: 2019_238865-Disclosures_Contributions.pdf [file 2019_238865-Disclosures_Contributions.pdf]

Haematologica  
HAEMATOL/2019/238865  
Version 3

AG-348 (Mitapivat), an allosteric activator of red blood cell pyruvate kinase, increases enzymatic activity, protein stability, and ATP levels over a broad range of PKLR genotypes

Minke A.E. Rab, Brigitte A. van Oirschot, Penelope A. Kosinski, Jeffrey Hixon, Kendall Johnson, Victor Chubukov, Lenny Dang, Gerard Pasterkamp, Stephanie van Straaten, Wouter W. van Solinge, Eduard J. van Beers, Charles Kung, and Richard van Wijk

Disclosures: The research has been supported by Agios Pharmaceuticals Inc, and in part by an unrestricted grant provided by RR Mechatronics RW and EJB are consultant for Agios Pharmaceuticals

Contributions: CK, BAO, PAK and RW designed the experiments. BAO, SS, KJ, VC and PAK recruited, and collected samples and/or performed experiments. PAK, JH, LD and CK provided AG-348. MAER, and RW analyzed the data and wrote the manuscript with input and revisions of BAO, PAK, GP, VC, WWS, EJB and CK.
